# Supplementary material for: Preparation, Characterization and Evaluation of the Anti-Inflammatory Activity of Epichlorohydrin-β-Cyclodextrin/Curcumin Binary Systems Embedded in a Pluronic®/Hyaluronate Hydrogel
Source: MDPI journal article supplement (doi:10.3390/ijms222413566), 2021-12-17
Supplement: s1 [file s1]

# **Preparation, characterization and evaluation of the anti-inflammatory activity of epichlorohydrin- $\beta$ -cyclodextrin/curcumin binary systems embedded in a Pluron-ic<sup>®</sup>/hyaluronate hydrogel**

Ana-María Fernández-Romero<sup>1</sup>, Francesca Maestrelli<sup>2</sup>, Sara García-Gil<sup>3</sup>, Elena Talero<sup>3</sup>, Paola Mura<sup>2</sup>, Antonio María Rabasco<sup>1</sup> and María Luisa González-Rodríguez<sup>1\*</sup>

1. Department of Pharmacy and Pharmaceutical Technology, Faculty of Pharmacy, Universidad de Sevilla, C/Prof. García González 2, 41012 Seville, Spain; anaferrom2@alum.us.es (AMFR); amra@us.es (AMR); malugoro@us.es (MLGR)

2. Department of Chemistry “Ugo Schiff” (DICUS), University of Florence, via Schiff 6, Sesto Fiorentino, 50019 Florence, Italy; francesca.maestrelli@unifi.it (FM); paola.mura@unifi.it (PM)

3. Department of Pharmacology, Faculty of Pharmacy, Universidad de Sevilla, C/ Prof. García González 2, 41012 Seville, Spain; saragarciaGil2307@gmail.com (SGG); etalero@us.es (ET)

Correspondence:

\*María Luisa González-Rodríguez (corresponding author): malugoro@us.es. Address Department of Pharmacy and Pharmaceutical Technology, Faculty of Pharmacy, Universidad de Sevilla, C/Prof. García González 2, 41012 Seville, Spain

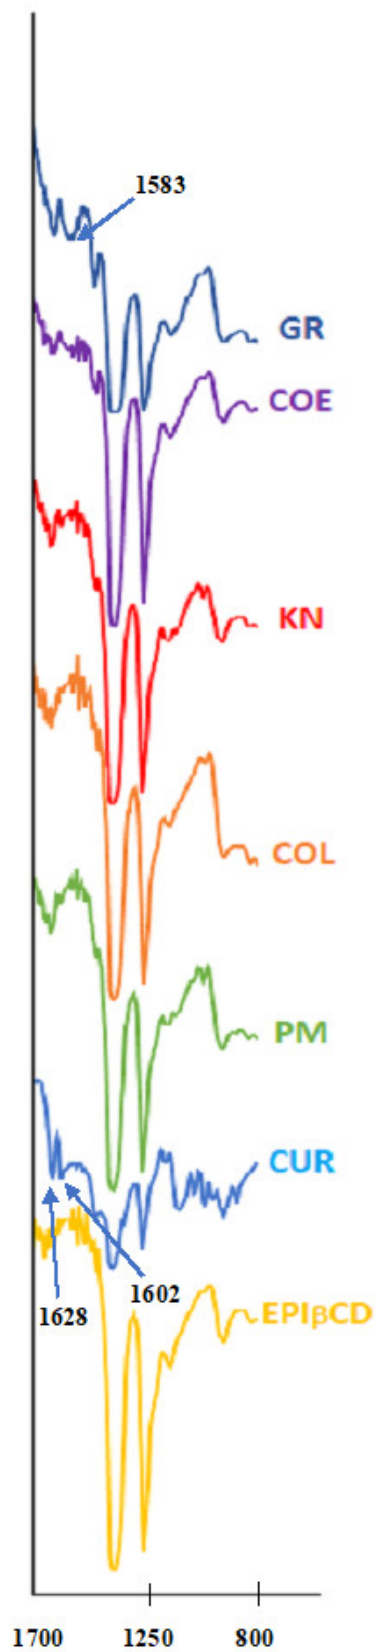

**Figure S1:** Augmented section of FTIR spectra. Abbreviations: GR, co-grinding; COE, co-evaporation; KN, kneading; COL, co-lyophilization.

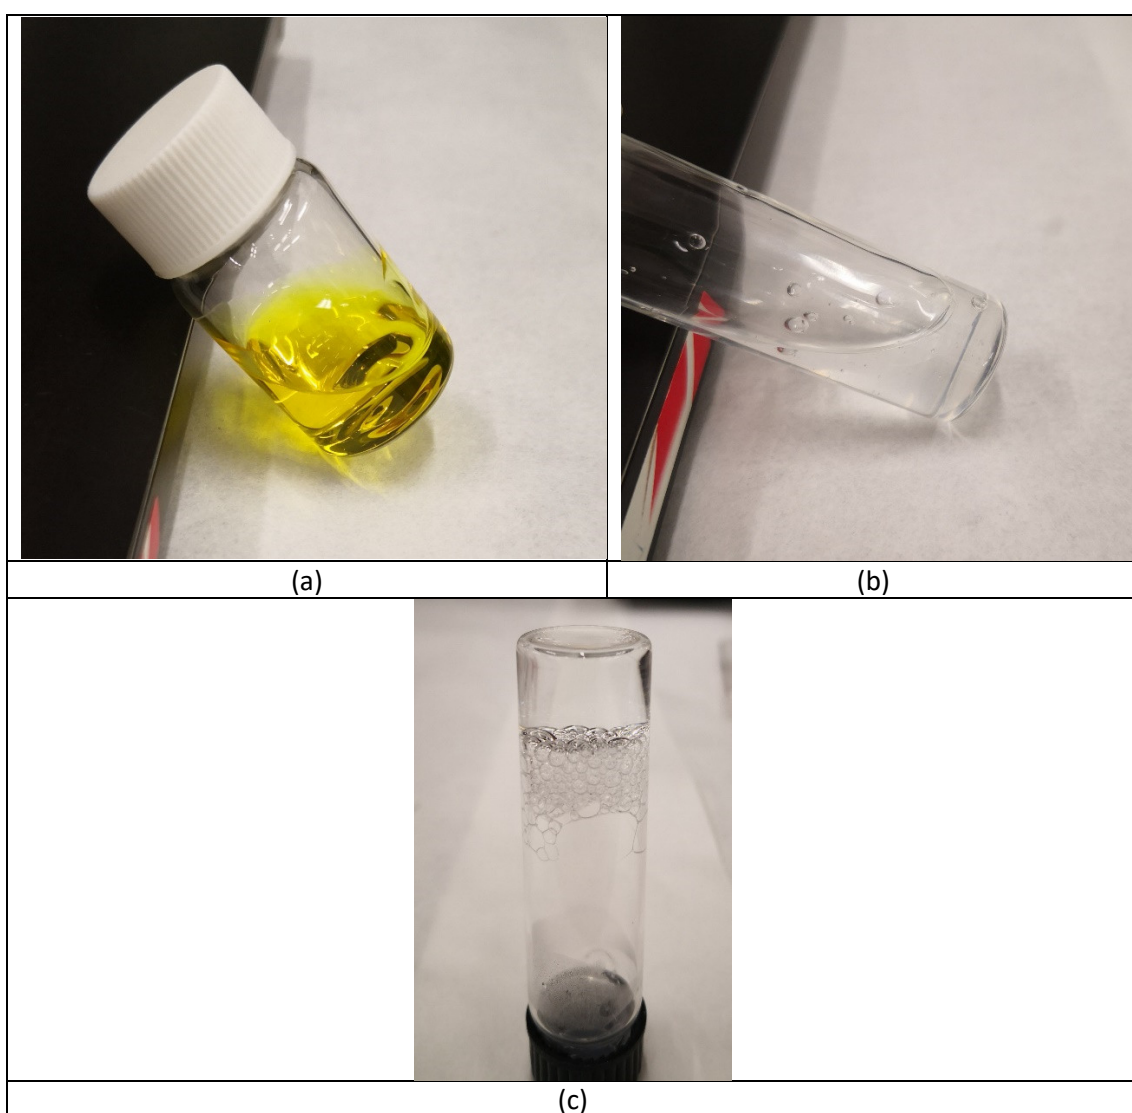

**Figure S2:** Photos of optimized hydrogel with CurEpi binary systema (a), optimized hydrogel empty (b) both heated at 20°C for 5 min and Pluronic® F-127 17% w/v (c) heated at 40°C for 5 min.
